# Supplementary material
Source: PubMed Central journal article supplement (PMC7534796)
Supplement: mmc1.pdf [file mmc1.pdf]

## S1. Detailed description of network measures and algorithms

### Bipartite network

Data collected with VERITAS-Social can be represented as a bipartite graph  $G = (V, E)$  with nodes separated in two disjoint and independent sets of nodes  $V_a$  and  $V_l$  and edges only connecting nodes of different sets. These sets contain the alters ( $V_a$ ) and the visited locations ( $V_l$ ), and the edges describe who are seen in each location. (Figure S1).

### Size, degree and density

The size of the network  $n = |V|$  refers to the number of nodes it contains. The number of alters and locations is denoted as  $p = |V_a|$  and  $q = |V_l|$ . The number of edges in the networks is denoted by  $m = |E|$ . The *neighbourhood*  $N_i$  is the set of nodes directly connected to  $i$ . The *degree* of the node  $i$  is the number of its neighbours  $k_i = |N_i|$ . The average degree within  $V_a$  and  $V_l$  can be calculated as  $\bar{k}(V_a) = m/p$  and  $\bar{k}(V_l) = m/q$ . The graph *density*  $d = m/pq$  is the ratio between the number of edges and the maximum possible numbers of edges in the network.

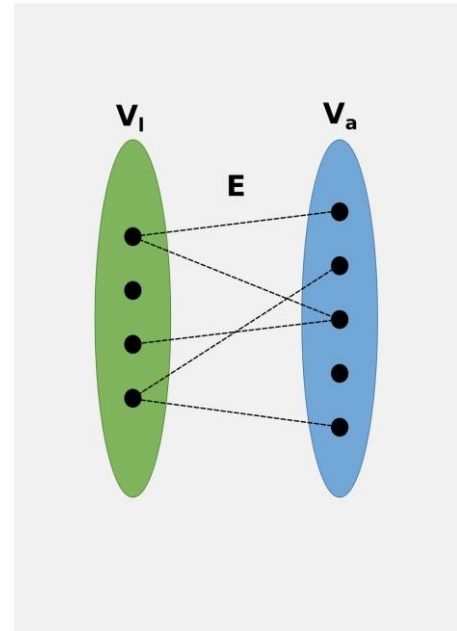

**Figure S1:** Visual example of a bipartite network composed of two sets of nodes  $V_a$  and  $V_l$ , and a set of edges  $E$  between the nodes of different sets. The two sets of nodes represent locations and alters, and the edges represent who are seen in each location. The nodes are positioned in two vertical layers to easily distinguish the two sets.

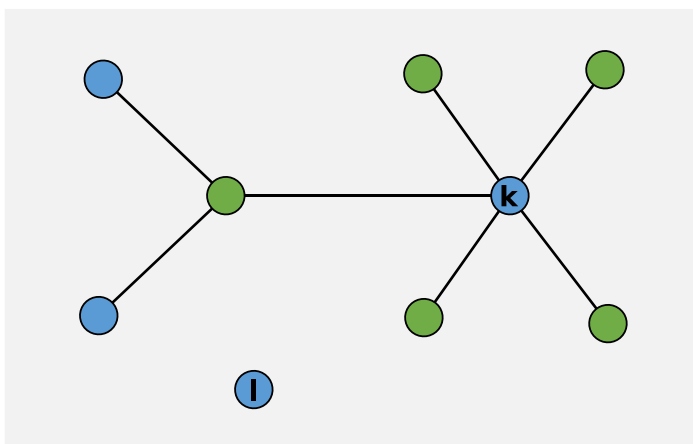

**Figure S2:** Visual example of size, degree and density in a hypothetical bipartite network of alters (blue nodes) and locations (green nodes). The total size of the network is 9, separated into 3 alters and 6 locations. The degree of node  $k$  is 5, which means that alter  $k$  is connected to 5 locations. Node  $l$  is disconnected from the rest of the network, which means that it has a degree of 0. There are 7 edges in the network, while the maximum possible total number is 27. Therefore, the network has a density of  $7/27 = 0.26$ .

## **Community structure**

*Community structure* is a concept that stems from the observation that real-world networks tend to be organized in groups of nodes with common properties. The problem is that this concept comes from an observation about regularities in empirical systems and there is no actual consensus on a formal definition. The most common understanding is that nodes are more likely to share edges within their own communities than with the rest of the network (Fortunato and Hric, 2016). But concretely, communities are mostly defined in an operational way, as they are the end product of community detection algorithms (Fortunato, 2010). In this paper, we used the LP&BRIM algorithm of Liu and Murata (2009), built on Barber's modularity (2007) and the label propagation algorithm (Raghavan et al., 2007), to identify non-overlapping communities composed of alters and locations. This algorithm tries to find the maximum value of the network *modularity* ( $Q$ ), a structural estimate of the network partition quality. In short, the modularity measures the difference between the actual and the expected number of edges within communities (see Newman and Girvan (2004) for a detailed description of modularity, and Barber (2007) for its calculation in bipartite network). An initial partition is first computed using an adaptation of the label propagation algorithm. Each node of a set ( $V_a$  or  $V_l$ ) is labelled with its own community, producing as many communities as there are nodes. Then, recursively, each node of the other set is labelled by the community most shared among its neighbours. The algorithm stops when each node is labelled with the community that is shared by most of its neighbors. The initial partition is then further refined using the bipartite recursive induced module algorithm (BRIM). It uses the spectral properties of the network to recursively relabel nodes of each set  $V_a$  and  $V_l$ , and it stops when a local maximum of  $Q$  is found (See Barber (2007) for a detailed description of this algorithm). For each network, the LP&BRIM algorithm was run 1000 times and the partition with the highest modularity value was retained.

Two additional indicators were calculated to assess the position of the nodes relatively to the identified communities (Guimerà and Amaral, 2005). *Within-module degree* is a z-score that the connectivity of a node with the other nodes of its community, defined as

$$z_i = \frac{k_i - \bar{k}_{s_i}}{\sigma_{s_i}}$$

where  $\bar{k}_{s_i}$  and  $\sigma_{s_i}$  are the average and the standard deviation of degrees in the community  $s$  of the node  $i$ . Two nodes having the same z-score can have different positions in the whole network, since a node can

also have connections with nodes of other communities. The *participation index* measures how nodes are located between the different communities in the network, defined as

$$p_i = 1 - \sum_{s=1}^c \left( \frac{k_{is}}{k_i} \right)^2$$

where  $k_{is}$  is the number of neighbors of node  $i$  in community  $s$ . The participation index takes a value of 0 if all edges of a node are within the same community and tend towards 1 if all edges are evenly distributed across all communities. The maximum value of the participation index depends on the number of communities, and equal to  $1 - \frac{1}{c}$ . In participants A and B bipartite networks, the maximum value is 0.75 as both networks are divided into 4 communities. See (Guimerà and Amaral, 2005) for a detailed discussion on *within-module degree* and *participation index*.

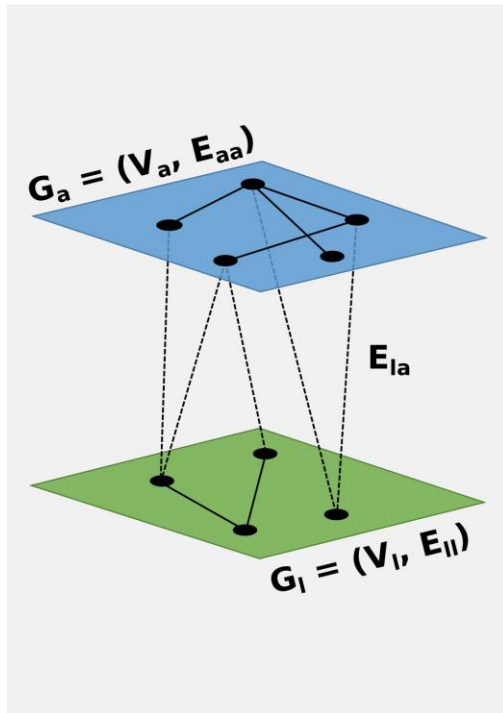

#### **interconnected networks**

VERITAS-Social data can also be represented as interconnected networks – a social network  $G_a = (V_a, E_{aa})$  and a spatial network  $G_l = (V_l, E_{ll})$  connected by a set of edges  $E_{al}$ . The social network contains the alters  $V_a$  connected by interpersonal relationships  $E_{aa}$  (i.e., who know whom). The spatial network contains the visited locations  $V_l$  connected by spatial relationships  $E_{ll}$ . The latter was not defined in this paper. The connections between alters and visited locations  $E_{al}$  are defined by who is seen in each location (Figure S1).

**Figure S3:** Visual representation of a system of interconnected networks composed of two sub-networks  $G_l = (V_l, E_{ll})$  and  $G_a = (V_a, E_{aa})$ , representing a spatial and a social network, and a set of edges  $E_{la}$  between the sub-networks. Nodes are positioned in two horizontal layers to easily distinguished the two sub-networks.

### Cross-clustering coefficient

The *cross-degree* is, for a node  $i$  from a sub-network, the number of its neighbours in the other sub-network. The cross degree for alters  $k_i^{al}$  and locations  $k_j^{la}$  are defined as follow

$$k_i^{al} = |N_i^{al}| : i \in V_a$$

$$k_j^{la} = |N_j^{la}| : j \in V_l$$

where  $N_i^{al}$  and  $N_j^{la}$  are the neighbours in the other sub-network. It is equivalent to the degree calculated in a bipartite network (their can be no connections between two neighbours of a same set).

The *cross-clustering coefficient* is the probability that two neighbours in the other sub-network are also connected to each other. Since edges between locations  $E_{ll}$  have not been defined in this paper, the cross-clustering coefficient has only been calculated for locations, defined as

$$cc_j^{la} = \frac{2|E(N_j^{la})|}{k_j^{la}(k_j^{la} - 1)}$$

where  $E(N_j^{la})$  is the set of edges between neighbours of location  $j$  in the social network  $G_a$  (Donges et al., 2011). This cross clustering coefficient is equivalent to the clustering coefficient calculated in a unipartite network (Watts and Strogatz, 1998). See Figure S2 for a visual illustration of the cross-clustering coefficient.

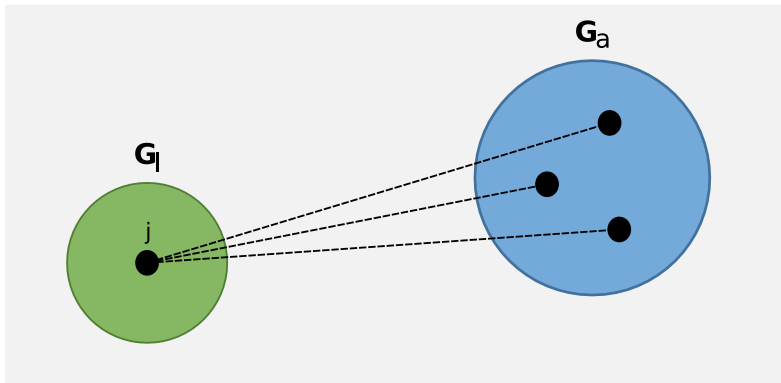

**Figure S4:** Visual illustration of the cross-clustering coefficient. For the node  $j$  within subnetwork  $G_l$ ,

$$cc_j^{la} = \frac{2 \cdot 1}{3(3-1)} = \frac{2}{6} = 0.33$$

## S2. Node-level network measures

| Node | Bipartite |          |                | Interconnected      |                              |
|------|-----------|----------|----------------|---------------------|------------------------------|
|      | Degree    | Clusters | Within z-score | Participation index | Cross-clustering coefficient |
| A1   | 5         |          | 1.79           | 0.32                | NA                           |
| A2   | 1         |          | -0.87          | 0                   | NA                           |
| A3   | 3         |          | 0.87           | 0.44                | NA                           |
| A4   | 1         |          | NA             | 0                   | NA                           |
| A5   | 1         |          | -0.33          | 0                   | NA                           |
| A6   | 1         |          | -0.33          | 0                   | NA                           |
| A7   | 1         |          | -0.33          | 0                   | NA                           |
| A8   | 1         |          | -0.33          | 0                   | NA                           |
| A9   | 1         |          | -0.33          | 0                   | NA                           |
| A10  | 1         |          | -0.33          | 0                   | NA                           |
| A11  | 1         |          | -0.33          | 0                   | NA                           |
| A12  | 1         |          | -0.33          | 0                   | NA                           |
| L1   | 1         |          | -0.45          | 0                   | NA                           |
| L2   | 1         |          | -0.45          | 0                   | NA                           |
| L3   | 1         |          | -0.45          | 0                   | NA                           |
| L4   | 1         |          | -0.45          | 0                   | NA                           |
| L5   | 1         |          | -0.45          | 0                   | NA                           |
| L6   | 3         |          | 0.87           | 0.44                | 0.67                         |
| L7   | 1         |          | -0.87          | 0                   | NA                           |
| L8   | 1         |          | NA             | 0                   | NA                           |
| L9   | 9         |          | 2.67           | 0.2                 | NA                           |
| L10  | 0         |          | NA             | NA                  | NA                           |
| L11  | 0         |          | NA             | NA                  | NA                           |
| L12  | 0         |          | NA             | NA                  | NA                           |

**Table S1:** Node-level measures for participant A's bipartite and interconnected networks. Alters and locations are labelled Ax and Lx respectively.

| Node | Bipartite |                        |            |                |                     | Interconnected               |
|------|-----------|------------------------|------------|----------------|---------------------|------------------------------|
|      | Degree    | Clustering Coefficient | Dependency | Within z-score | Participation index | Cross clustering coefficient |
| A13  | 2         | 0.42                   | 0          | NA             | 0                   | NA                           |
| A14  | 3         | 0.36                   | 0          | NA             | 0.44                | NA                           |
| A15  | 1         | 0.58                   | 0          | -0.45          | 0                   | NA                           |
| A16  | 1         | 0.58                   | 0          | -0.45          | 0                   | NA                           |
| A17  | 1         | 0.58                   | 0          | -0.45          | 0                   | NA                           |
| A18  | 2         | 0.42                   | 0          | -0.45          | 0.5                 | NA                           |
| A19  | 11        | 0.14                   | 5          | 2.04           | 0.68                | NA                           |
| A20  | 2         | 0.47                   | 0          | -0.06          | 0                   | NA                           |
| A21  | 2         | 0.47                   | 0          | -0.06          | 0                   | NA                           |
| A22  | 1         | 0.69                   | 0          | -0.48          | 0                   | NA                           |
| A23  | 1         | 0.69                   | 0          | -0.48          | 0                   | NA                           |
| A24  | 1         | 0.69                   | 0          | -0.48          | 0                   | NA                           |
| A25  | 1         | 0.69                   | 0          | -0.48          | 0                   | NA                           |
| A26  | 1         | 0.69                   | 0          | -0.48          | 0                   | NA                           |
| A27  | 1         | 0.69                   | 0          | -0.48          | 0                   | NA                           |
| A28  | 2         | 0.47                   | 0          | -0.06          | 0                   | NA                           |
| A29  | 2         | 0.47                   | 0          | -0.06          | 0                   | NA                           |
| A30  | 0         | NA                     | 0          | NA             | NA                  | NA                           |
| A31  | 0         | NA                     | 0          | NA             | NA                  | NA                           |
| L13  | 3         | 0.34                   | 0          | NA             | 0.44                | 1                            |
| L14  | 3         | 0.34                   | 0          | NA             | 0.44                | 1                            |
| L15  | 6         | 0.18                   | 3          | 1.79           | 0.5                 | 0.4                          |
| L16  | 1         | 0.56                   | 0          | -0.41          | 0                   | NA                           |
| L17  | 1         | 0.56                   | 0          | -0.41          | 0                   | NA                           |
| L18  | 1         | 0.56                   | 0          | -0.41          | 0                   | NA                           |
| L19  | 1         | 0.56                   | 0          | -0.41          | 0                   | NA                           |
| L20  | 1         | 0.56                   | 0          | -0.41          | 0                   | NA                           |
| L21  | 3         | 0.26                   | 0          | -0.06          | 0.44                | 1                            |
| L22  | 3         | 0.26                   | 0          | -0.06          | 0.44                | 1                            |
| L23  | 12        | 0.12                   | 6          | 3.26           | 0.29                | 1                            |

**Table S2:** Node-level measures for participant B’s bipartite and interconnected networks. Alters and locations are labelled Ax and Lx respectively.

### S3. Alters and locations characteristics

Tables S3 to S6 present the characteristics of alters and locations reported by participants A and B. In the tables describing *alters* (Table S3 and S5), different variables are used to describe people and groups. For people, *age* in number of years, *gender* in binary format, *relation type* in 6 categories (i.e., spouse, child, other family member, friend, acquaintance, work colleague) and *interaction frequency* in number of times per year are provided. For *groups*, the *relation types* of most group members, *interaction frequency*, *group size* and *group description* in verbatim transcription are provided. For *locations* (Table S4 and S6), *type of location* in 25 categories used to collect activities during CURHA, *frequency of attendance* in number of times per year, *usual mode of transportation* in 4 categories (i.e., walking, car, car other, public transportation), *geographical location* and *distance from home* are provided. Geographic locations are defined according to the Sherbrooke boroughs and the surrounding administrative municipalities. These boundaries were taken from the SDA20K dataset available in the Quebec Open Data Portal (Données Québec, 2019). Distances from home were calculated as shortest routes according to the road network with GRASS 7.0.4 (Neteler et al., 2012) and using CanMap Streetfiles V2013.3 (DMTI Spatial Inc, 2013).

| Node   | Type   | Age | Gender | Relation | Frequency of interactions | Group size | Group descriptive |
|--------|--------|-----|--------|----------|---------------------------|------------|-------------------|
| A1     | Person | 55  | F      | Children | Daily                     | NA         | NA                |
| A2     | Person | 21  | F      | Family   | Daily                     | NA         | NA                |
| A3     | Person | 84  | F      | Friend   | Weekly                    | NA         | NA                |
| A4     | Person | 86  | F      | Friend   | Weekly                    | NA         | NA                |
| A5-A6  | Group  | NA  | NA     | Friend   | Weekly                    | 4          | Volunteering      |
| A7-A12 | Group  | NA  | NA     | Friend   | Weekly                    | 34         | Choral            |

Table S3: Characteristics of participant A's alters

| Node | Type                 | Frequency    | Transportation | Location        | Distance |
|------|----------------------|--------------|----------------|-----------------|----------|
| L1   | General practitioner | Annually     | Car other      | Mont-Bellevue   | 13.08    |
| L2   | Shopping centre      | Monthly      | Car other      | Jacques-Cartier | 9.88     |
| L3   | Medical specialist   | Semiannually | Car other      | Fleurimont      | 11.74    |
| L4   | Restaurant           | Monthly      | Car other      | Jacques-Cartier | 11.27    |
| L5   | Grocery store        | Weekly       | Car other      | Jacques-Cartier | 9.74     |
| L6   | Home                 | NA           | NA             | Bromptonville   | NA       |
| L7   | Alter residence      | Monthly      | Walking        | Bromptonville   | 0.54     |
| L8   | Alter residence      | Semimonthly  | Walking        | Bromptonville   | 1.06     |
| L9   | Church               | Weekly       | Walking        | Bromptonville   | 0.59     |
| L10  | Pharmacy             | Weekly       | Walking        | Bromptonville   | 1.1      |
| L11  | Grocery store        | Weekly       | Walking        | Bromptonville   | 0.59     |
| L12  | Bank                 | Monthly      | Walking        | Bromptonville   | 0.46     |

Table S4: Characteristics of participant A's visited locations

| <b>Node</b> | <b>Type</b> | <b>Age</b> | <b>Gender</b> | <b>Relation</b> | <b>Frequency of interactions</b> |
|-------------|-------------|------------|---------------|-----------------|----------------------------------|
| A13         | Person      | 50         | F             | Family          | Weekly                           |
| A14         | Person      | 50         | M             | Children        | Weekly                           |
| A15         | Person      | 75         | M             | Friend          | Monthly                          |
| A16         | Person      | 65         | M             | Acquaintance    | Monthly                          |
| A17         | Person      | 60         | M             | Friend          | Monthly                          |
| A18         | Person      | 60         | M             | Friend          | Weekly                           |
| A19         | Person      | 85         | F             | Spouse          | Daily                            |
| A20         | Person      | 75         | M             | Friend          | Weekly                           |
| A21         | Person      | 75         | F             | Friend          | Weekly                           |
| A22         | Person      | 65         | F             | Friend          | Weekly                           |
| A23         | Person      | 60         | M             | Friend          | Weekly                           |
| A24         | Person      | 60         | F             | Friend          | Weekly                           |
| A25         | Person      | 60         | F             | Friend          | Weekly                           |
| A26         | Person      | 60         | F             | Family          | Weekly                           |
| A27         | Person      | 70         | M             | Friend          | Weekly                           |
| A28         | Person      | 67         | F             | Friend          | Weekly                           |
| A29         | Person      | 70         | M             | Friend          | Weekly                           |
| A30         | Person      | 55         | M             | Friend          | Monthly                          |
| A31         | Person      | 70         | M             | Friend          | Annually                         |

**Table S5:** Characteristics of participant B's alters

| <b>Node</b> | <b>Description</b>   | <b>Frequency</b> | <b>Transportation</b> | <b>Location</b> | <b>Distance</b> |
|-------------|----------------------|------------------|-----------------------|-----------------|-----------------|
| L13         | Home                 | NA               | NA                    | Newport         | NA              |
| L14         | Visiting people      | Monthly          | Walking               | Newport         | 0.54            |
| L15         | Restaurant           | Semimonthly      | Car other             | Lennoxville     | 35.95           |
| L16         | Bank                 | Quarterly        | Car other             | Cookshire-Eaton | 12.82           |
| L17         | General practitioner | Quarterly        | Car other             | East Angus      | 22.40           |
| L18         | Convenience store    | Semimonthly      | Car other             | Cookshire-Eaton | 4.84            |
| L19         | Convenience store    | Semimonthly      | Car other             | Cookshire-Eaton | 4.92            |
| L20         | Pharmacy             | Monthly          | Car other             | Cookshire-Eaton | 12.89           |
| L21         | Visiting people      | 5 times per year | Car other             | Newport         | 11.39           |
| L22         | Visiting people      | Bimonthly        | Car other             | Newport         | 7.70            |
| L23         | Church               | Weekly           | Car other             | Cookshire-Eaton | 4.77            |

**Table S6:** Characteristics of participant B's visited locations



#### **S4. Including groups in network analysis**

With VERITAS-Social, alters can either represent individually declared or groups of people. Including both forms of alters can be problematic during network analysis. Treating groups as individual nodes underestimates the number of people encountered in certain locations, whereas treating them as  $n$  nodes, where  $n$  is the size of the group, may have a too strong impact on the size of the network and its underlying properties. To illustrate, for respondent A, two groups, consisting of 34 and 4 people, are seen in location L9. If we consider each of these groups as a single node, L9 has a degree of 3 and there is 6 alters in the network. If we consider these groups as  $n$  nodes, the degree of L9 and the number of alters change to 39 and 44, respectively. These marked differences will have an impact on the properties of the network, such as density and community structure. We suggest that weighting the number nodes by first transforming  $n$  (e.g.,  $\sqrt{n}$ ) can provide a more appropriate estimate of social exposure across locations while reducing the effect of large groups (in the Canadian CURHA sample, the largest reported group is 150 individuals). Nevertheless, the reported individuals and group members may not play similar roles (e.g., group members not reported individually may be acquaintances providing few health-relevant social resources), although these relationships will be considered as equivalent in this analysis.

## References

- Barber, M.J., 2007. Modularity and community detection in bipartite networks. *Physical Review E* 76, 066102. <https://doi.org/10.1103/PhysRevE.76.066102>
- DMTI Spatial Inc, 2013. CanMap Streetfiles. CanMap.
- Donges, J.F., Schultz, H.C.H., Marwan, N., Zou, Y., Kurths, J., 2011. Investigating the topology of interacting networks. *Eur. Phys. J. B* 84, 635–651. <https://doi.org/10.1140/epjb/e2011-10795-8>
- Données Québec, 2019. Quebec open data portal. URL <https://www.donneesquebec.ca/> (accessed 1.15.19).
- Fortunato, S., 2010. Community detection in graphs. *Physics Reports* 486, 75–174. <https://doi.org/10.1016/j.physrep.2009.11.002>
- Fortunato, S., Hric, D., 2016. Community detection in networks: A user guide. *Physics Reports*, Community detection in networks: A user guide 659, 1–44. <https://doi.org/10.1016/j.physrep.2016.09.002>
- Guimerà, R., Amaral, L.A.N., 2005. Functional cartography of complex metabolic networks. *Nature* 433, 895. <https://doi.org/10.1038/nature03288>
- Liu, X., Murata, T., 2009. Community Detection in Large-Scale Bipartite Networks, in: *Proceedings of the 2009 IEEE/WIC/ACM International Joint Conference on Web Intelligence and Intelligent Agent Technology - Volume 01, WI-IAT '09*. IEEE Computer Society, Washington, DC, USA, pp. 50–57. <https://doi.org/10.1109/WI-IAT.2009.15>
- Neteler, M., Bowman, M.H., Landa, M., Metz, M., 2012. GRASS GIS: A multi-purpose open source GIS. *Environmental Modelling & Software* 31, 124–130. <https://doi.org/10.1016/j.envsoft.2011.11.014>
- Newman, M.E., Girvan, M., 2004. Finding and evaluating community structure in networks. *Physical review E* 69, 026113. <https://doi.org/10.1103/PhysRevE.69.026113>
- Raghavan, U.N., Albert, R., Kumara, S., 2007. Near linear time algorithm to detect community structures in large-scale networks. *Physical review E* 76, 036106. <https://doi.org/10.1103/PhysRevE.76.036106>
- Watts, D.J., Strogatz, S.H., 1998. Collective dynamics of ‘small-world’ networks. *nature* 393, 440–442. <https://doi.org/10.1038/30918>
